# Longevity of SARS-CoV-2 Antibody in Health Care Workers: 6-Months Follow Up

Michael Brant-Zawadzki<sup>1</sup>, Deborah Fridman<sup>1</sup>, Philip A. Robinson<sup>2</sup>, Randy German<sup>3</sup>,  
Arell Shapiro<sup>4</sup>, Marcus Breit<sup>5</sup>, Stacy Wilton<sup>1</sup>, Elmira Burke<sup>6</sup>, Jason R. Bock<sup>7</sup>, Junko Hara<sup>1,7</sup>

<sup>1</sup>Hoag Center for Research and Education, Hoag Memorial Hospital Presbyterian, Newport Beach, California, United States; <sup>2</sup>Infection Prevention, Hoag Memorial Hospital Presbyterian, Newport Beach, California, United States; <sup>3</sup>Laboratory Administrative Services, Hoag Memorial Hospital Presbyterian, Newport Beach, California, United States; <sup>4</sup>Transfusion & Laboratory Medicine, Hoag Memorial Hospital Presbyterian, Newport Beach, California, United States; <sup>5</sup>Hoag Family Cancer Institute, Hoag Memorial Hospital Presbyterian, Newport Beach, California, United States; <sup>6</sup>Quality Management, Hoag Memorial Hospital Presbyterian, Newport Beach, California, United States; <sup>7</sup>EMBIC Corporation, Newport Beach, California, United States

\*Corresponding Author: [junko.hara@hoag.org](mailto:junko.hara@hoag.org)

All authors have contributed to the development of this study.

## Abstract

The prevalence and longevity of acquired immunity to coronavirus disease 2019 (**COVID-19**) in health care workers (**HCWs**) is of great interest, especially with the roll-out of vaccines for SARS-CoV-2. Determining such immunity may enhance knowledge about susceptibility of HCWs to COVID-19, frequency of vaccine administration, and degree of workplace risk, and may also support enactment of better workplace policies and procedures.

The present study reports on 6-months follow-up serosurveillance to determine the longevity of SARS-CoV-2 antibodies in HCWs.

Sub-sample (n=35) of the original serosurveillance in HCWs (n = 3,458) with baseline, 8-week, and 6-month blood sampling were analyzed. Information on job duties, location, COVID-19 symptoms, polymerase chain reaction test history, travel since January 2020, and household contacts with COVID-19 was collected.

Of 35 subjects, 13 were seropositive at baseline and maintained positivity at 8-week follow-up, with 3 losing positivity at 6-month follow-up. Among 22 subjects who were seronegative at baseline and seropositive at 8-week follow-up, all but one maintained positivity at 6-month follow-up. There was no significant effect of all factors (e.g., age, gender, job duties) examined at the .05 level on seropositivity at 6-month follow-up. The observed antibody longevity was 7.0+/-0.6 months for seropositive subjects (n=13), and 4.5+/-0.8 months for those seronegative subjects (n=22), at baseline. The longest duration of seropositivity observed in this cohort was 7.9 months (236 days).

With reported COVID-19-related symptoms up to 4.7 months prior to baseline blood sampling, possibly longer antibody presence is suggested. Similarly, seropositivity at 6-month follow-up further suggests greater antibody longevity than observed in this study.

## **Introduction**

The prevalence and longevity of acquired immunity to coronavirus disease 2019 (**COVID-19**) in health care workers (**HCWs**) is of great interest, especially with the roll-out of vaccines for SARS-CoV-2. Determining such immunity may enhance knowledge about susceptibility of HCWs to COVID-19, frequency of vaccine administration, and degree of workplace risk, and may also support enactment of better workplace policies and procedures.

Prior sero-surveillance studies among HCWs have reported widely ranging antibody prevalence from 89.3% in Wuhan, China (n=424) [1], 35.8% in New York City (n=285) [2], to 7.4% in Milan, Italy [3], and 2.67% in Denmark (n=28,792) [4]. Our previous HCW sero-surveillance studies have shown a low prevalence of antibodies ranging from 0.98% to 2.58% depending on sampling timing (e.g., before or after partial state re-opening in late May, 2020) [5,6]. Serology prevalence in HCWs was found to be loosely correlated with community prevalence [6].

The longevity of antibody presence has also been reported, though sparsely, with varying range among HCWs [7-9]. This study reports 6-month follow-up serosurveillance conducted on subsamples from our HCW cohort studied in May through August, 2020, at Hoag Memorial Hospital Presbyterian, California, United States.

## **Methods**

### **Subject Recruitment, Enrollment, and Data Collection**

IRB approval was obtained for this study (Providence St. Joseph Health IRB # 2020000337). The original HCWs cohort (n=3,458) was recruited by email notification to the entire employee workforce and medical staff [6]. Consenting participants were interviewed with regards to job duties, location, COVID-19 symptoms (i.e., fever, sore throat, cough, rhinorrhea, loss of taste or smell), PCR test history, travel record, and existence of household contacts with COVID-19. Job duties were used to further classify subjects into high (e.g., MD, RN, ICU tech), medium (e.g., phlebotomist, medical tech), or low (e.g., admin, IT) risk groups to stratify levels of direct exposure to COVID-19. A blood sample (~5ml) was collected at enrollment and 8-week follow-up, from each subject for serum analysis for IgG antibodies to SARS-CoV-2 using the VITROS Anti-SARS-CoV-2 IgG Reagent Pack and Calibrator on the VITROS® XT 7600 instrument by Ortho Clinical Diagnostics approved for the FDA emergency use authorization.

### **6-Month Blood Sampling**

Additional blood samples were collected at 6-month follow-up from those who had positive antibody results at the initial and 8-week follow-up, or at 8-week follow-up only, with a total of 96 subjects eligible. However, due to the COVID-19 vaccine roll-out around the time of 6-month follow-up, with some subjects already vaccinated by the time of their blood sampling, 61 subjects were excluded from analysis, resulting in 35 subjects (36%) included in this study. The study was discontinued after January 24, 2021.

## Analysis

A Mann-Whitney U test was used to assess the significance of age, and a series of one-sided Fisher's exact tests were used for gender, race, and job risk level, on seropositivity at 6-month follow-up. Longevity of antibody positivity was plotted for each subject along with a self-reported polymerase chain reaction (PCR) test history, onset of COVID-19 related symptoms, prior travel record, close contact with COVID-19 patients, and rank-ordered by baseline antibody results, and then job risk levels.

## Results

**Table 1** summarizes sample characteristics (n=35). Of 35 subjects, 13 were seropositive at baseline and maintained positivity at 8-week follow-up, with 3 losing positivity at 6-month follow-up. Among 22 subjects who were seronegative at baseline and seropositive at 8-week follow-up, all but one maintained positivity at 6-month follow-up. A Mann-Whitney U test and Fisher's exact tests showed no significant effect of all factors examined at the .05 level on seropositivity at 6-month follow-up.

**Table 1. Sample Characteristics**

|                                         | Job Low Risk | Job Medium Risk | Job High Risk | Total        |
|-----------------------------------------|--------------|-----------------|---------------|--------------|
|                                         | n = 9 (26%)  | n = 4 (11%)     | n = 22 (63%)  | N = 35       |
| Baseline - Antibody Positive, count (%) | 4 (44%)      | 3 (75%)         | 6 (27%)       | 13 (37%)     |
| 2-month - Antibody Positive, count (%)  | 9 (100%)     | 4 (100%)        | 22 (100%)     | 35 (100%)    |
| 6-month - Antibody Positive, count (%)  | 7 (78%)      | 4 (100%)        | 20 (91%)      | 31 (89%)     |
|                                         |              |                 |               |              |
| Age in yrs., <i>M (SD)</i>              | 35.44 (8.83) | 36.25 (4.57)    | 34.05 (9.42)  | 34.66 (8.70) |
| Female, count (%)                       | 7 (78%)      | 2 (50%)         | 19 (86%)      | 28 (80%)     |
| Race, count (%)                         |              |                 |               |              |
| American Indian or Alaska Native        | 0            | 0               | 0             | 0            |
| Asian                                   | 2 (22%)      | 1 (25%)         | 5 (23%)       | 8 (23%)      |
| Black                                   | 0            | 0               | 0             | 0            |
| Hispanic or Latino                      | 3 (33%)      | 2 (50%)         | 3 (14%)       | 8 (23%)      |
| Native Hawaiian or Pacific Islander     | 1 (11%)      | 0               | 1 (5%)        | 2 (6%)       |
| White                                   | 3 (33%)      | 1 (25%)         | 11 (50%)      | 15 (43%)     |
| Other                                   | 0            | 0               | 2 (9%)        | 2 (6%)       |

**Figure 1** shows longevity of antibody positivity, demonstrating 7.0 $\pm$ 0.6 months of longevity for seropositive subjects (n=13), and 4.5 $\pm$ 0.8 months for those seronegative subjects (n=22), at baseline. The longest duration of seropositivity observed in this cohort was 7.9 months (236 days).

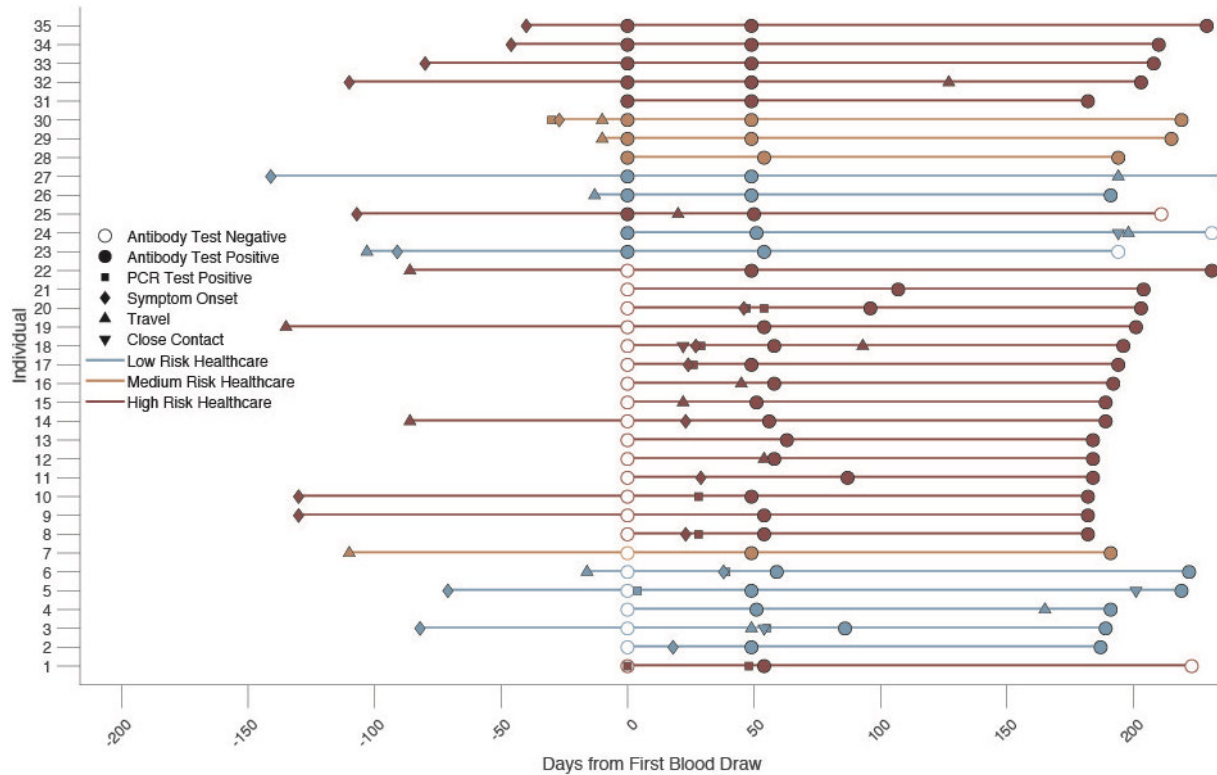

**Figure 1. SARS-CoV-2 antibody positivity.** SARS-CoV-2 antibody positivity at baseline (0 at x-axis), 8-week, and 6-month follow up are plotted for each subject. Other factors possibly affecting antibody positivity including self-reported COVID-19 diagnosis, COVID-19 symptoms onset, and travel history are also included.

## Discussion

Our data suggests antibody longevity of up to 7.9 months, with possibly greater longevity, in our HCWs. This finding corroborates other antibody longevity studies reporting greater longevity than previously observed in mixed cohort of patients, HCWs, and general public [10-12], up to 8 months of longevity [11].

Among those seropositive at baseline, eight reported COVID-19-related symptoms up to 4.7 months prior to baseline blood sampling, suggesting possibly longer antibody presence. Similarly, the fact that all seropositive cases except four maintained seropositivity at 6 months, further suggests greater antibody longevity than observed in this study.

This finding is encouraging for both those with acquired immunity from subclinical infection, and those who would acquire immunity by vaccination. A study from the National Cancer Institute reports that people with positive antibodies have substantial immunity to SARS-CoV-2, which means they may be at lower risk for future infection [13]. It is not known whether waning

antibody presence equates to a loss of T-cell based immunity. Our findings may help guide prioritization of HCWs for immunization based on their serology history.

## Acknowledgement

We acknowledge our healthcare workers who have contributed to this study.

## References

1. Zhang S, Guo M, Wu F, et al. Factors associated with asymptomatic infection in health-care workers with SARS-CoV-2 infection in Wuhan, China: a multi-center retrospective cohort study. *Clin Microbiol Infect.* 2020;S1198-743X(20)30521-8. doi: 10.1016/j.cmi.2020.08.038. Online ahead of print.
2. Mansour M, Leven E, Muellers K, et al. Prevalence of SARS-CoV-2 Antibodies Among Healthcare Workers at a Tertiary Academic Hospital in New York City. *J Gen Intern Med.* 2020;35(8):2485-2486. doi: 10.1007/s11606-020-05926-8. Epub 2020 Jun 3.
3. Sotgiu G, Barassi A, Miozzo M, et al. SARS-CoV-2 specific serological pattern in healthcare workers of an Italian COVID-19 forefront hospital. *BMC Pulm Med.* 2020; 20: 203. doi: 10.1186/s12890-020-01237-0.
4. Iversen K, Bundgaard H, Hasselbalch RB, et al. Risk of COVID-19 in health-care workers in Denmark: an observational cohort study. *Lancet Infect Dis.* 2020 Aug 3. doi: 10.1016/S1473-3099(20)30589-2. Epub ahead of print.
5. Brant-Zawadzki M, Fridman D, Robinson PA, Zahn M, Chau C, German R, Breit M, Bock JR, Hara J. SARS-CoV-2 antibody prevalence in health care workers: Preliminary report of a single center study. *PLOS ONE.* 2020.;15(11):e0240006. doi: 10.1371/journal.pone.0240006.
6. Brant-Zawadzki M, Fridman D, Robinson PA, Zahn M, Chau C, German R, Breit M, Burke E, Bock JR, Hara J. Prevalence and Longevity of SARS-CoV-2 Antibodies Among Healthcare Workers, *Open Forum Infectious Diseases.* ofab015, 2021,
7. Patel MM, Thornburg NJ, Stubblefield WB, et al. Change in Antibodies to SARS-CoV-2 Over 60 Days Among Health Care Personnel in Nashville, Tennessee. *JAMA.* 2020;324(17):1781–1782. doi:10.1001/jama.2020.18796
8. Lumley SF, O'Donnell D, Stoesser NE, Matthews PC, Howarth A, Hatch SB, et al. Antibodies to SARS-CoV-2 are associated with protection against reinfection. *MedRxiv.* 2020. doi: <https://doi.org/10.1101/2020.11.18.20234369>
9. Kuehn BM. Health Workers' Antibody Levels Wane After SARS-CoV-2 Infection. *JAMA.* 2021;325(2):122. doi:10.1001/jama.2020.25457
10. Wajnberg A, Amanat F, Firpo A, et al. Robust neutralizing antibodies to SARS-CoV-2 infection persist for months. *Science.* 2020;230(6521):1227-1230. DOI: 10.1126/science.abd7728

11. Seow J, Graham C, Merrick B, et al. Longitudinal observation and decline of neutralizing antibody responses in the three months following SARS-CoV-2 infection in humans. *Nature Microbiol.* *Nat Microbiol.* 2020;5:1598–1607. DOI: 10.1038/s41564-020-00813-8
12. Figueiredo-Campos P, Blankenhaus B, Mota C, et al. Seroprevalence of anti-SARS-CoV-2 antibodies in COVID-19 patients and healthy volunteers up to 6 months post disease onset. *Eur J Immunol.* 2020;50:2025–2040. DOI: 10.1002/eji.202048970
13. Harvey RA, Rassen JA, Kabelac CA, et al. Association of SARS-CoV-2 Seropositive Antibody Test With Risk of Future Infection. *JAMA Intern Med.* Published online February 24, 2021. doi:10.1001/jamainternmed.2021.0366
